# Supplementary material for: SiO2@Ag/AgCl: a low-cost and highly efficient plasmonic photocatalyst for degrading rhodamine B under visible light irradiation
Source: Royal Society of Chemistry journal article supplement (doi:10.1039/c4ra10843d), 2014-01-01
Supplement: c4ra10843d1.pdf [file c4ra10843d1.pdf]

## Supporting Information

### **SiO<sub>2</sub>@Ag/AgCl: A low-cost and highly efficient plasmonic photocatalyst active under visible light**

Xuefeng Xu,<sup>a</sup> Man Wang,<sup>a</sup> Yanyan Pei,<sup>a</sup> Changchun Ai\*<sup>b</sup> and Liangjie Yuan\*<sup>a</sup>

*<sup>a</sup> College of Chemistry and Molecular Sciences, Wuhan University,  
Wuhan, 430072, P.R.China*

*<sup>b</sup> School of Chemical Engineering & Pharmacy, Wuhan Institute of  
Technology, Wuhan, 430072, P.R.China*

\*Corresponding author. Fax: +86-27-68752800; Tel: +86-13808661002; E-mail:  
ljyuan@whu.edu.cn (L. J. Yuan)

\*Corresponding author. Fax: +86-27-68752800; Tel: +86-27-68752800; E-mail:  
aicchun@whu.edu.cn (C. C. Ai)

Fig S1 SEM image of SiO<sub>2</sub>@Ag/AgCl after 1 h of ultrasonication.

Fig S2 SEM image of pure Ag/AgCl.

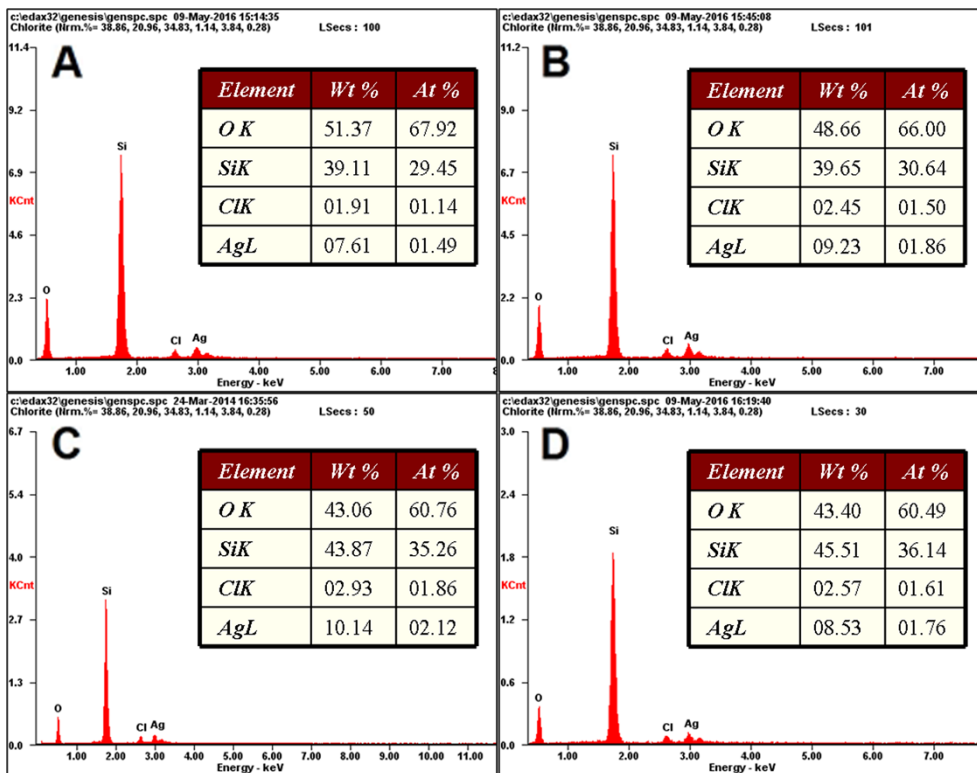

Fig S3 EDS spectra of (A)SAA-1, (B)SAA-2, (C)SAA-3 and (D)SAA-4.

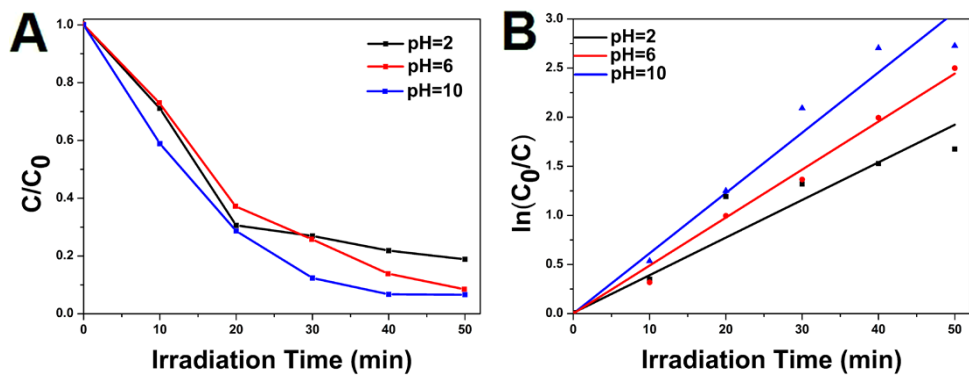

Fig S4 (A) Photocatalytic degradation efficiencies of RhB solution with different pH over SAA-3 under visible light irradiation ( $\lambda \geq 420\text{nm}$ ), (B) kinetic linear simulation curves.  $C_0$  is the concentration after absorption, and  $C$  is concentration at time  $t$ .

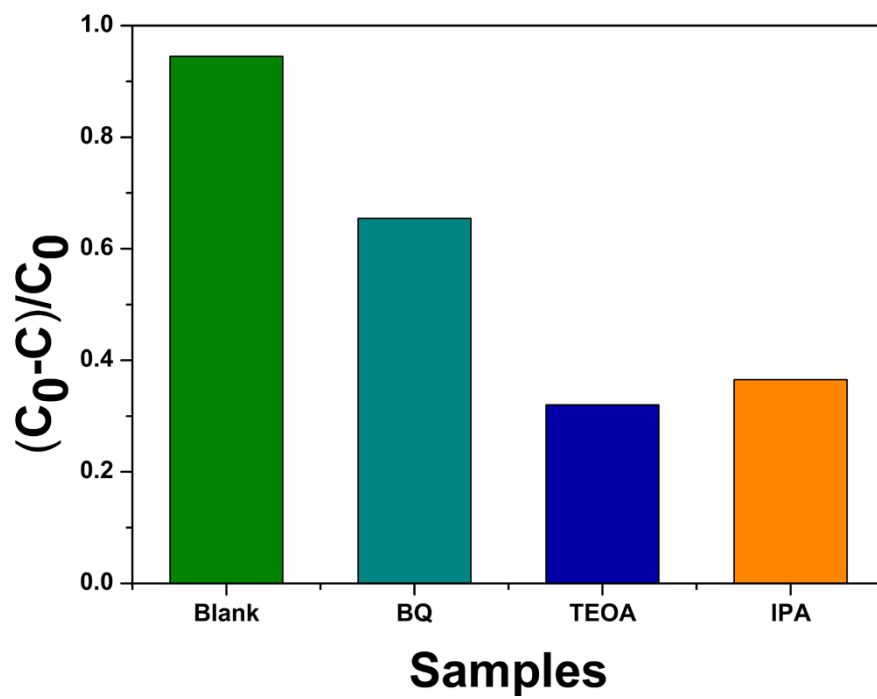

Fig S5 Effects of a series of scavengers on the degradation efficiency of RhB.

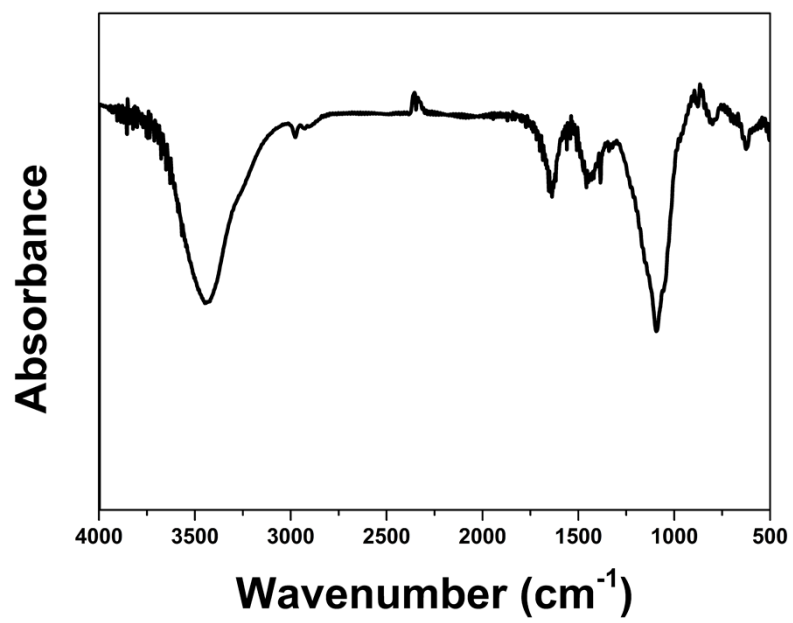

Fig S6 FTIR spectra of pure SiO<sub>2</sub>.

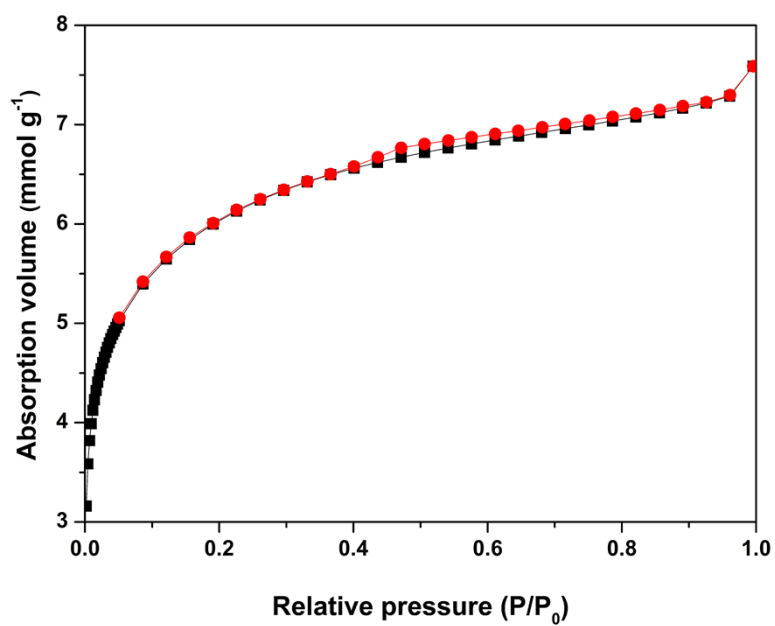

Fig S7  $\text{N}_2$  adsorption and desorption isotherm of pure  $\text{SiO}_2$ .



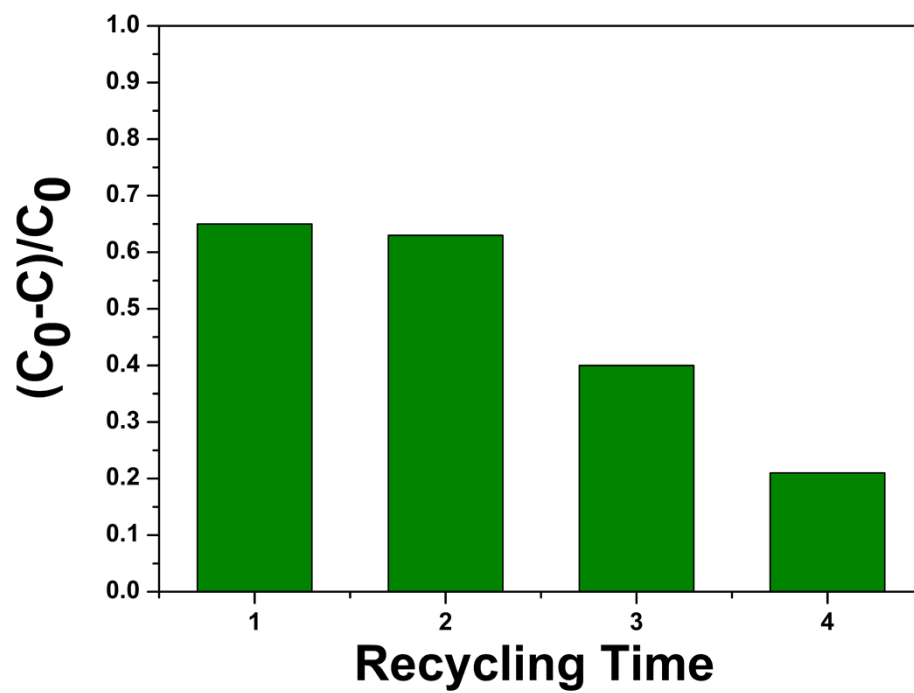

Fig S8 Four cycling experiments results of pure Ag/AgCl.
